# Supplementary material for: Voluntary control of wearable robotic exoskeletons by patients with paresis via neuromechanical modeling
Source: PubMed Central journal article supplement (PMC6637518; doi:10.1186/s12984-019-0559-z), 2019-07-17
Supplement: 12984_2019_559_MOESM3_ESM.pdf [file 12984_2019_559_MOESM3_ESM.pdf]

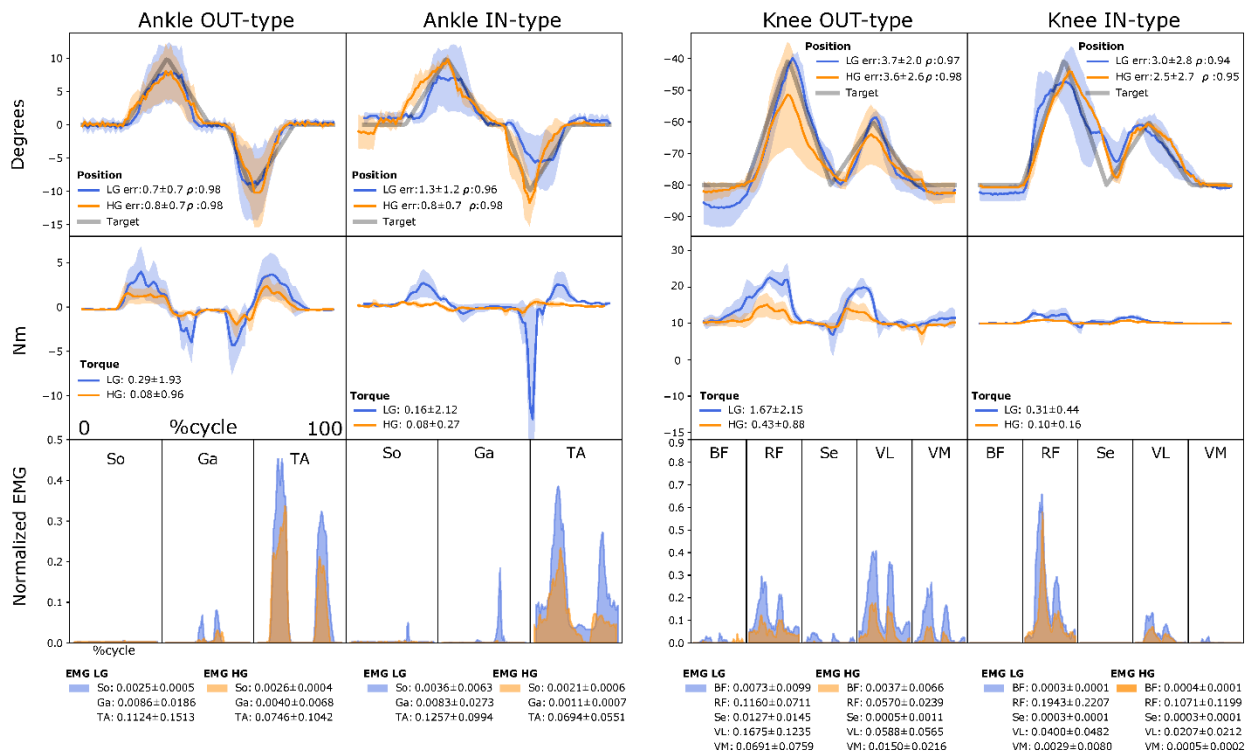

22

23 **Supplementary figure S1. Tracking task performance during single-DOF tests for healthy subject 3.**

24 Exoskeleton joint angular position, electromyography (EMG) data as well as model-based estimates of joint  
 25 moments (torque) are reported during single degree of freedom (DOF) tasks. Data are reported as averaged  
 26 across all tracking trials. They are reported for the low-gain (LG) and high-gain (HG) exoskeletons assistance  
 27 levels and as a function of percent cycle, i.e. where 0% and 100% respectively represents the beginning and  
 28 the end of the tracking trajectory (Target). Results are relative to tests outside and inside of the exoskeleton  
 29 respectively, i.e. OUT-type and IN-type. Results are reported both for the individual control of the exoskeleton  
 30 ankle plantar-dorsiflexion DOF and for that of the exoskeleton knee flexion-extension DOF. EMGs are relative  
 31 to muscles including: biceps femoris (BF), rectus femoris (RF), semimembranosus (S), vastus lateralis (VL)  
 32 and vastus medialis (VM), soleus (So), gastrocnemius medialis (Ga) and tibia anterior (TA), i.e. Table 2.  
 33 Average ± standard deviation of EMG linear envelopes are reported at the bottom of the graph.

34

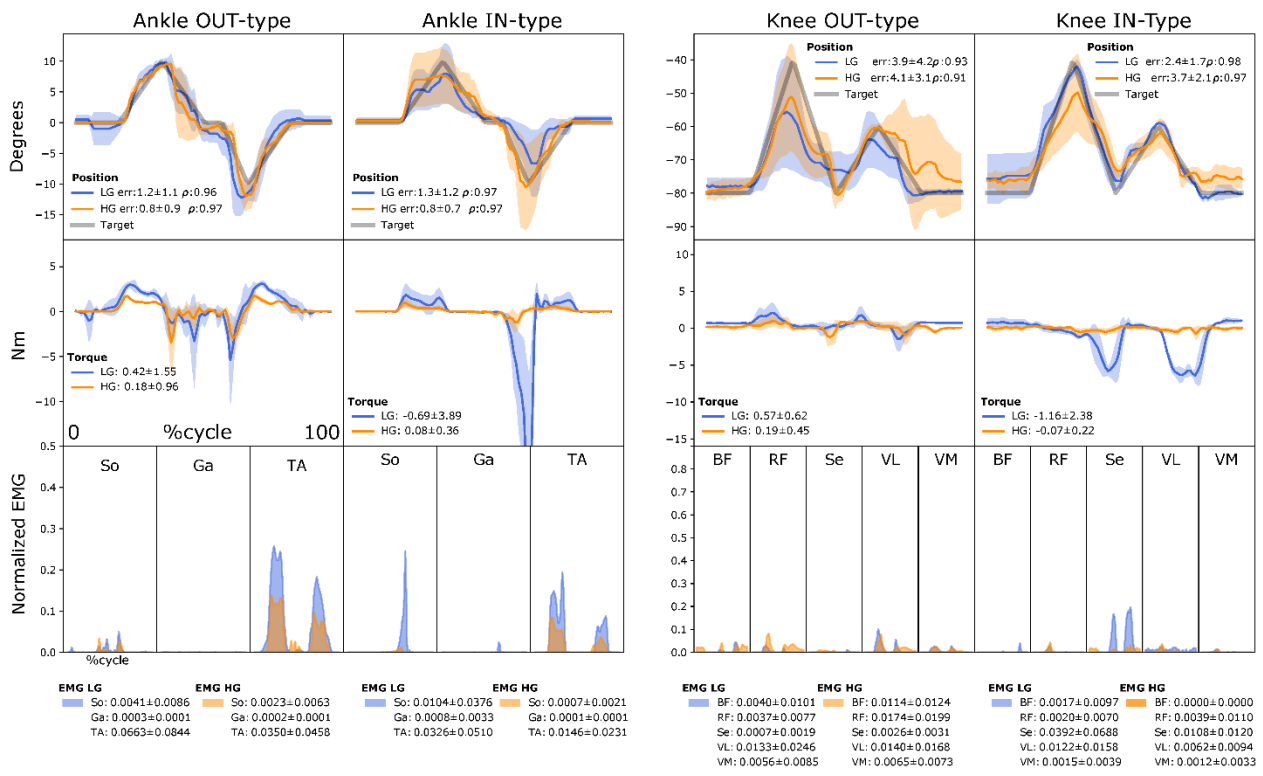

35  
 36 **Supplementary figure S2. Tracking task performance during single-DOF tests for healthy subject 4.**  
 37 Exoskeleton joint angular position, electromyography (EMG) data as well as model-based estimates of joint  
 38 moments (torque) are reported during single degree of freedom (DOF) tasks. Data are reported as averaged  
 39 across all tracking trials. They are reported for the low-gain (LG) and high-gain (HG) exoskeletons assistance  
 40 levels and as a function of percent cycle, i.e. where 0% and 100% respectively represents the beginning and  
 41 the end of the tracking trajectory (target). Results are relative to tests outside and inside of the exoskeleton, i.e.  
 42 OUT-type and IN-type respectively. Results are reported both for the individual control of the exoskeleton  
 43 ankle plantar-dorsiflexion DOF and for that of the exoskeleton knee flexion-extension DOF. EMGs are relative  
 44 to muscles including: biceps femoris (BF), rectus femoris (RF), semimembranosus (S), vastus lateralis (VL)  
 45 and vastus medialis (VM), soleus (So), gastrocnemius medialis (Ga) and tibias anterior (TA), i.e. Table 2.  
 46 Average ± standard deviation of EMG linear envelopes are reported at the bottom of the graph.

## EMG Reduction Ankle IN-type

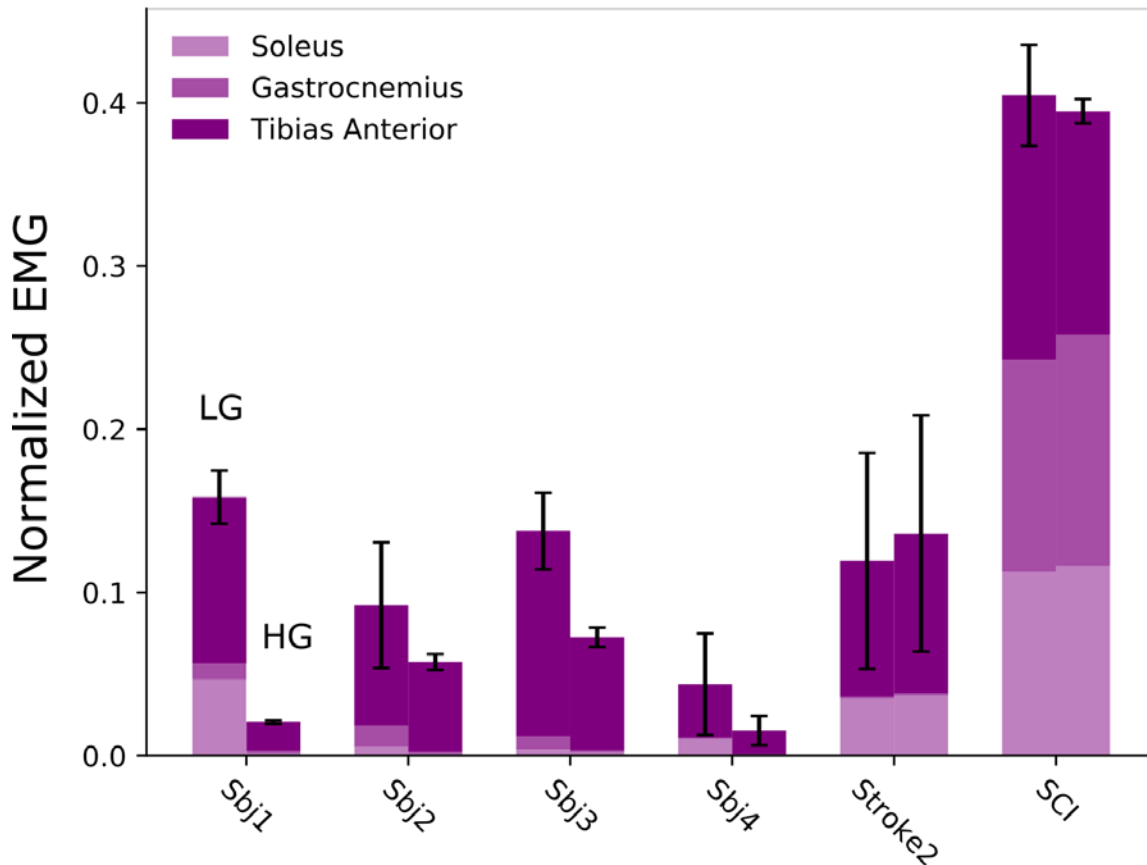

47

48

49

50

51

52

53

54

55

**Supplementary figure S3. EMG amplitude modulation between exoskeleton low- and high-assistance levels during single ankle plantar-dorsi flexion, IN-type experiments.** Electromyography (EMG) amplitude is consistently reduced when transitioning from low-gain (LG, left-hand vertical bar) to high-gain (HG, right-hand vertical bar) exoskeleton support levels. Experiments were performed while wearing the robotic exoskeleton, i.e. IN-type tests. For each subject (Healthy 1-4) as well as for stroke patient 2 (Stroke) and the spinal cord injury (SCI) patient (Table 1) the vertical bars report mean normalised EMG amplitude stacked vertically for each muscles along with standard deviation (i.e. see black vertical lines).

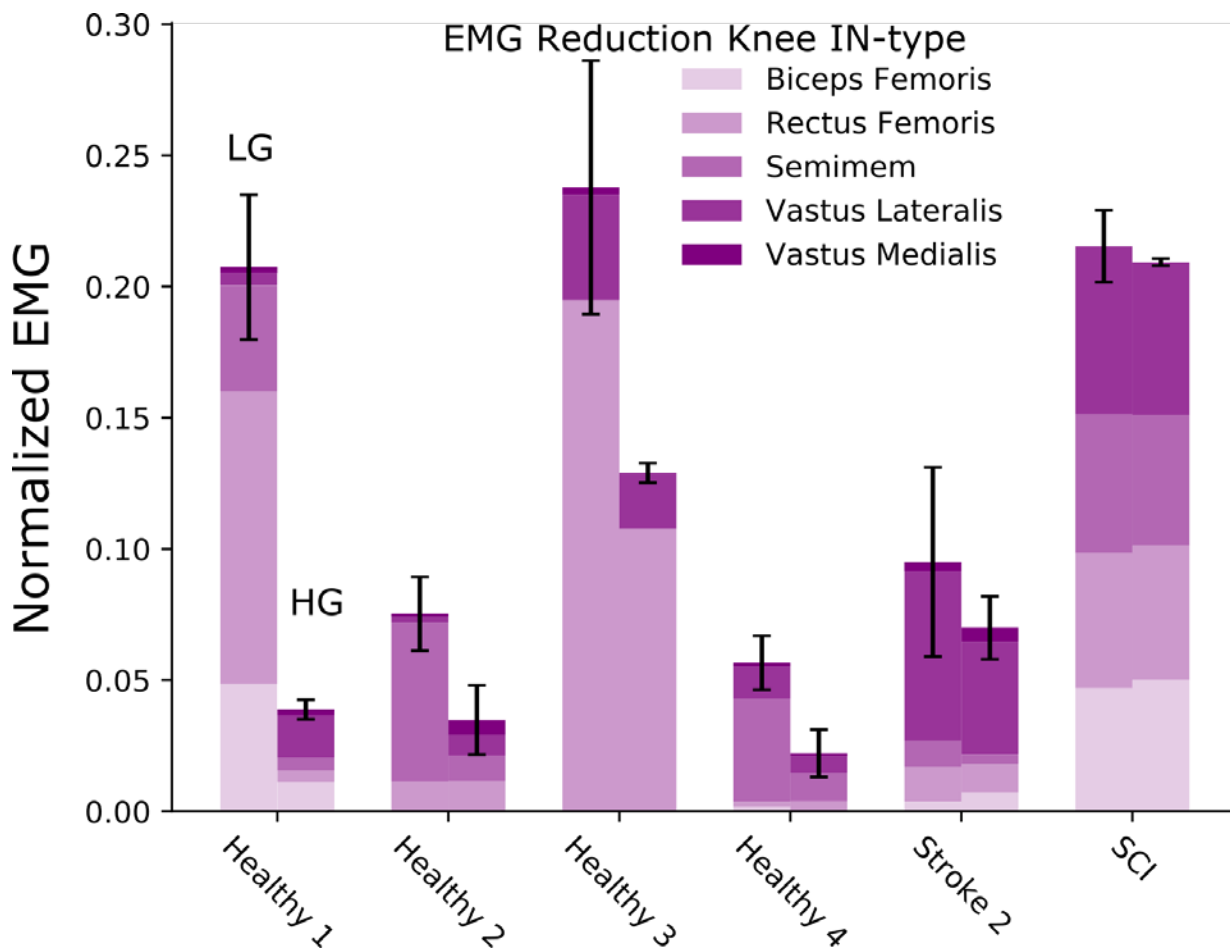

56

57

58

59

60

61

62

63

64

**Supplementary figure S4. EMG amplitude modulation between exoskeleton low- and high-assistance levels during single knee flexion-extension, IN-type experiments.** Electromyography (EMG) amplitude is consistently reduced when transitioning from low-gain (LG, left-hand vertical bar) to high-gain (HG, right-hand vertical bar) exoskeleton support levels. Experiments were performed while wearing the robotic exoskeleton, i.e. IN-type tests. For each subject (Healthy 1-4) as well as for stroke patient 2 (Stroke) and the spinal cord injury (SCI) patient (Table 1) the vertical bars report mean normalised EMG amplitude stacked vertically for each muscles along with standard deviation (i.e. see black vertical lines).

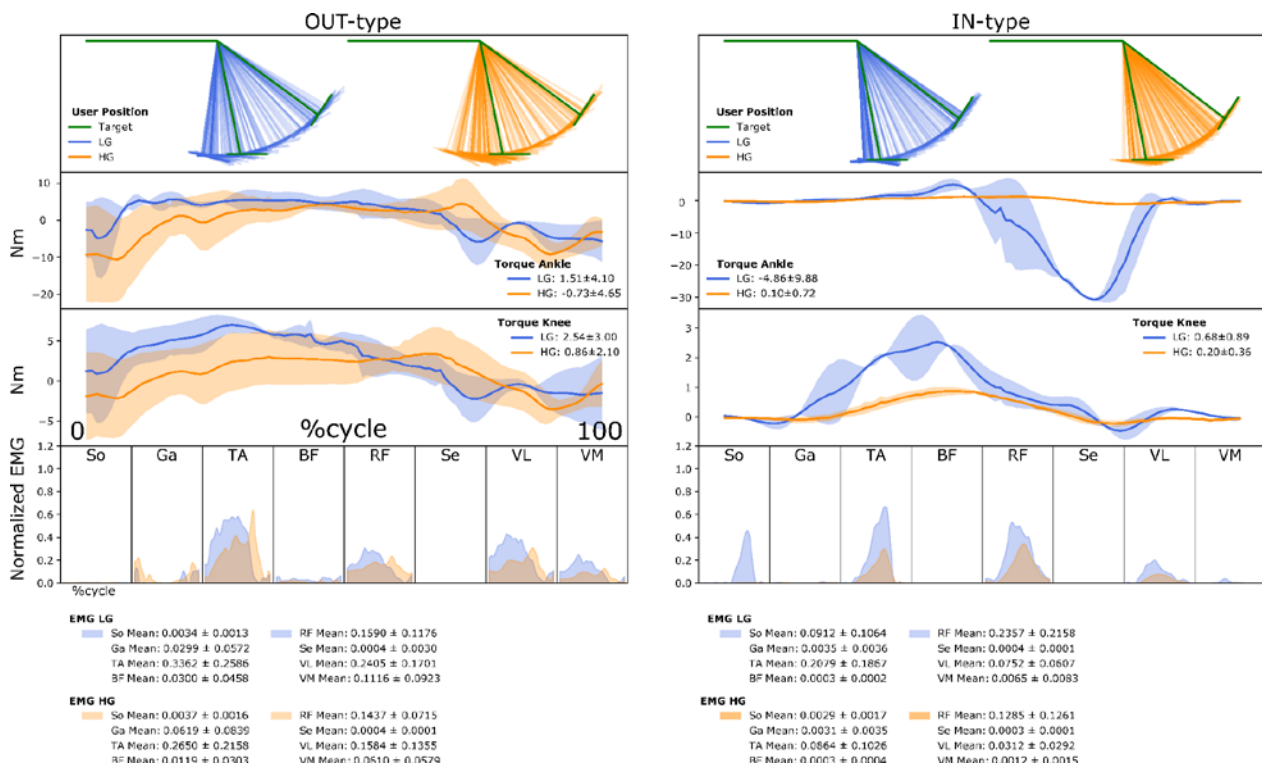

65

66 **Supplementary figure S5: Tracking task performance during multi-DOF, OUT- and IN-type tests for**  
 67 **healthy subject 3.** Exoskeleton knee and ankle joint angular positions are reported by means of a stick-figure.  
 68 The green figure represents the target multi-joint position to be tracked. The blue and orange stick-figures  
 69 respectively represent the subject's voluntary controlled exoskeleton trajectory obtained using a low-gain (LG)  
 70 and high-gain (HG) assistance levels. Model-based estimates of joint moments (torque) are reported both about  
 71 the knee flexion-extension and ankle plantar-dorsi flexion degree of freedom (DOFs). Data are reported as  
 72 averaged across all tracking trials. They are reported as a function of percent cycle, i.e. where 0% and 100%  
 73 respectively represents the beginning and the end of the tracking trajectory (target). Recorded  
 74 electromyography (EMGs) signals are relative to muscles including: biceps femoris (BF), rectus femoris (RF),  
 75 semimembranosus (S), vastus lateralis (VL) and vastus medialis (VM), soleus (So), gastrocnemius medialis  
 76 (Ga) and tibias anterior (TA), i.e. Table 2. Average  $\pm$  standard deviation of EMG linear envelopes are reported  
 77 at the bottom of the graph.

78

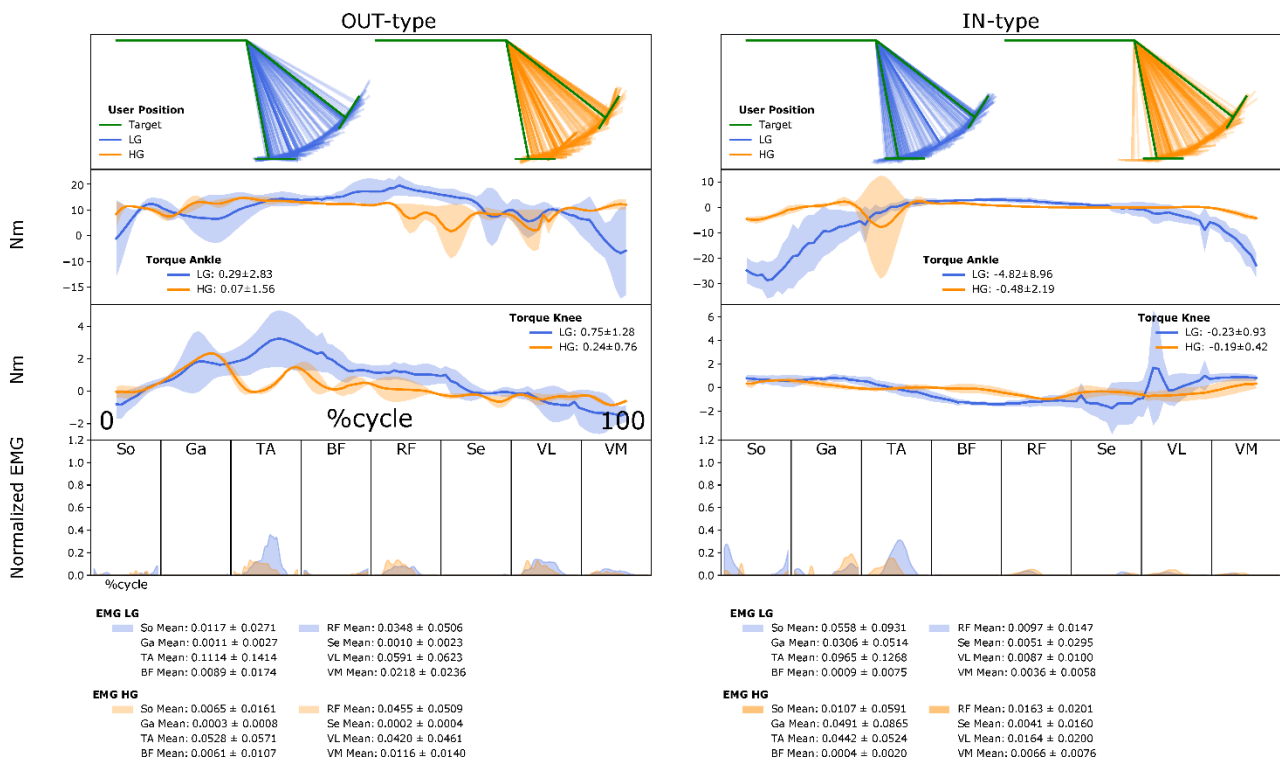

79

80 **Supplementary figure S6: Tracking task performance during multi-DOF, OUT- and IN-type tests for**  
 81 **healthy subject 4.** Exoskeleton knee and ankle joint angular positions are reported by means of a stick-figure.  
 82 The green figure represents the target multi-joint position to be tracked. The blue and orange stick-figures  
 83 respectively represent the subject's voluntary controlled exoskeleton trajectory obtained using a low-gain (LG)  
 84 and high-gain (HG) assistance levels. Model-based estimates of joint moments (torque) are reported both about  
 85 the knee flexion-extension and ankle plantar-dorsi flexion degree of freedom (DOFs). Data are reported as  
 86 averaged across all tracking trials. They are reported as a function of percent cycle, i.e. where 0% and 100%  
 87 respectively represents the beginning and the end of the tracking trajectory (target). Recorded  
 88 electromyography (EMGs) signals are relative to muscles including: biceps femoris (BF), rectus femoris (RF),  
 89 semimembranosus (S), vastus lateralis (VL) and vastus medialis (VM), soleus (So), gastrocnemius medialis  
 90 (Ga) and tibias anterior (TA), i.e. Table 2. Average  $\pm$  standard deviation of EMG linear envelopes are reported  
 91 at the bottom of the graph.

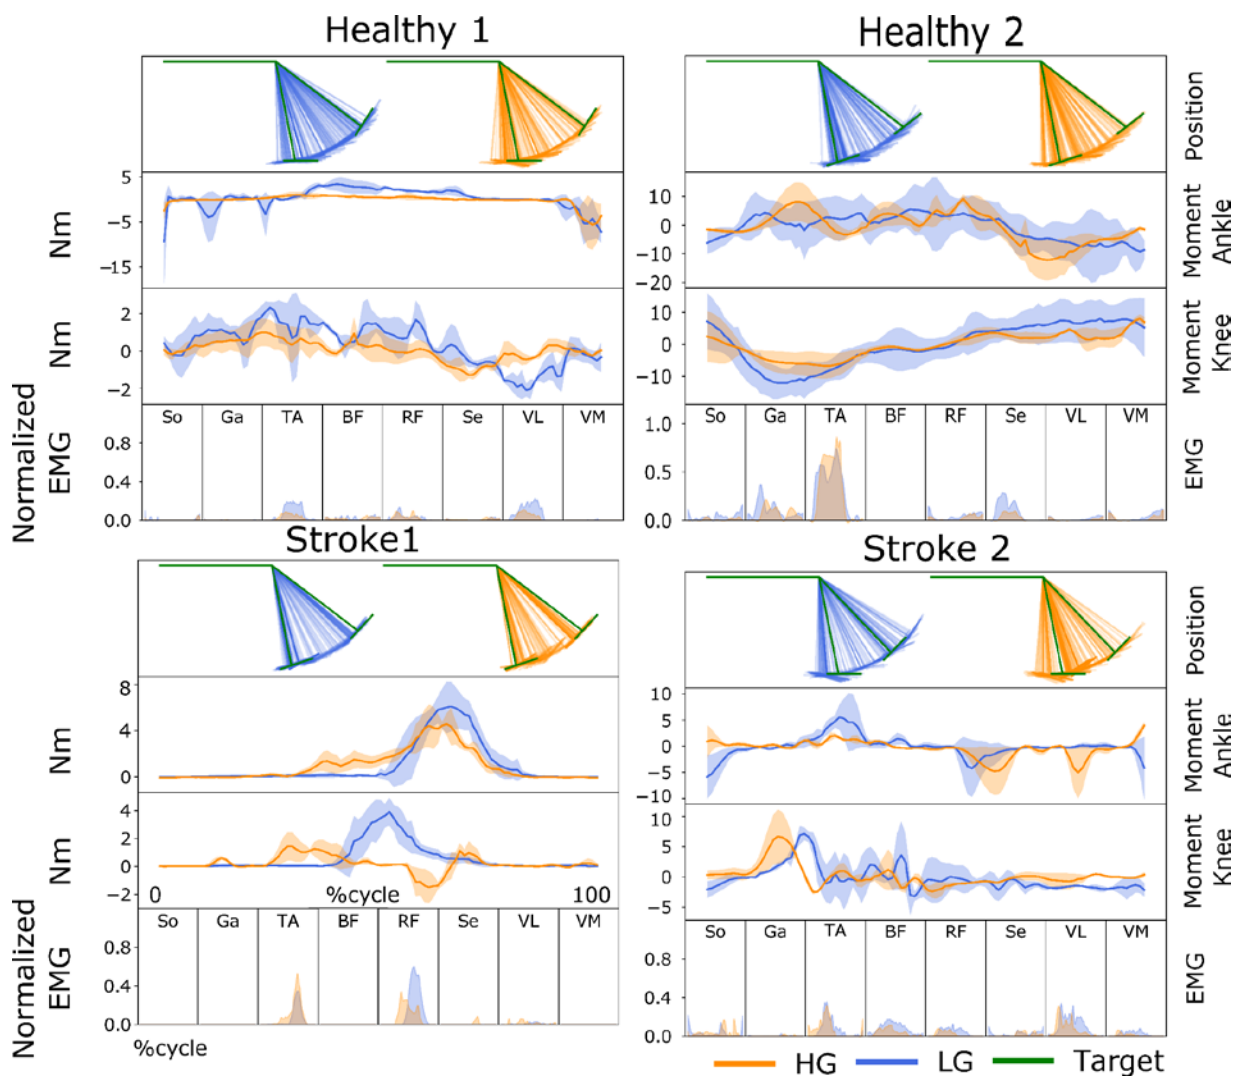

92

93 **Supplementary figure S7. Tracking task performance during multi-DOF, OUT-type tests.** Exoskeleton  
 94 knee and ankle joint angular positions are reported by means of a stick-figure. The green figure represents the  
 95 target multi-joint position to be tracked. The blue and orange stick-figures respectively represent the subject's  
 96 voluntarily controlled exoskeleton trajectory obtained using a low-gain (LG) and high-gain (HG) assistance  
 97 levels. Model-based estimates of joint moments are reported both about the knee flexion-extension and ankle  
 98 plantar-dorsi flexion degree of freedom (DOFs). Data are reported as averaged across all tracking trials. They  
 99 are reported as a function of percent cycle, i.e. where 0% and 100% respectively represents the beginning and  
 100 the end of the tracking trajectory (Target). Results are relative to tests inside of the exoskeleton, i.e. OUT-type.  
 101 Data are reported for two representative healthy subjects (Healthy 1-2) and two stroke patients (Stroke 1-2),  
 102 i.e. Table 1. Recorded electromyography (EMGs) signals are relative to muscles including: biceps femoris  
 103 (BF), rectus femoris (RF), semimembranosus (S), vastus lateralis (VL) and vastus medialis (VM), soleus (So),  
 104 gastrocnemius medialis (Ga) and tibialis anterior (TA), i.e. Table 2.

105



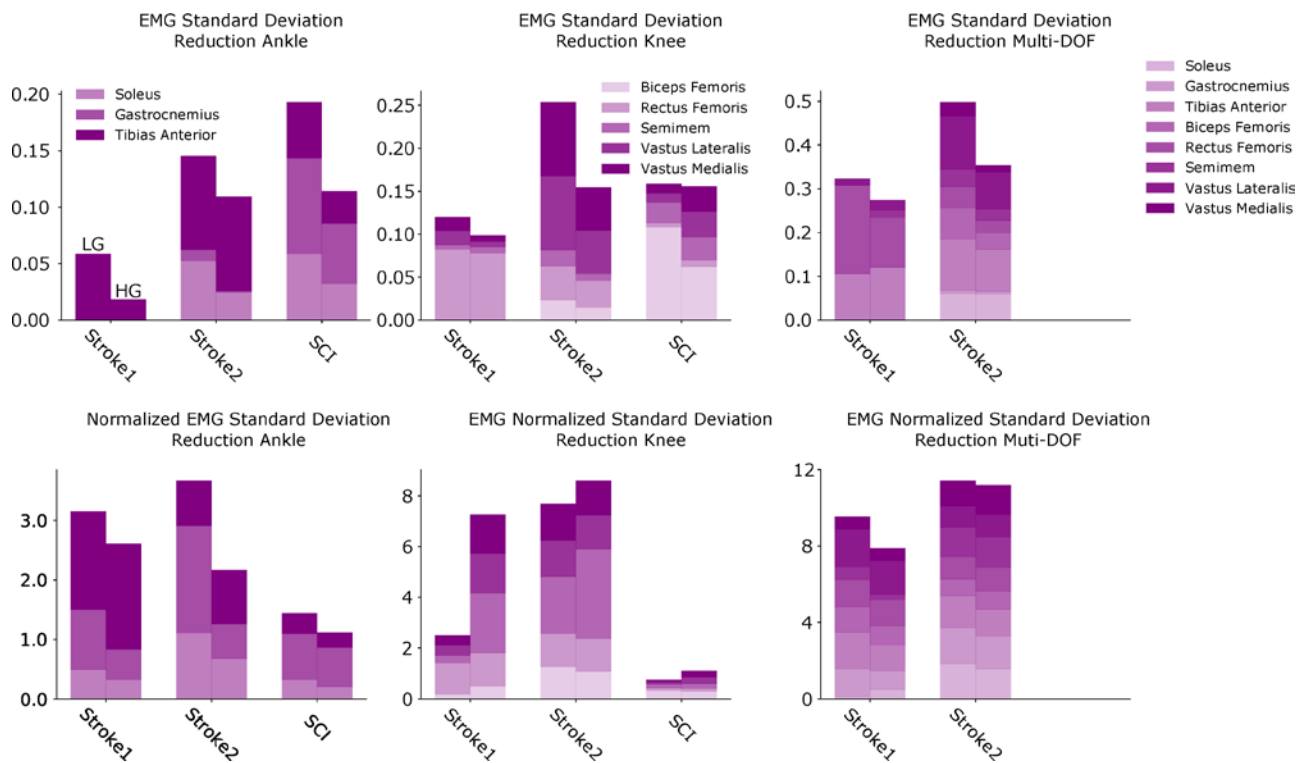

106

107 **Supplementary figure S8. Standard deviation of the mean EMG amplitude during single-DOF and**  
 108 **multi-DOF, OUT-type tests.** Histograms report non-normalized standard deviation (top-row) and normalized  
 109 standard deviation (bottom-row, Eq. 3) extracted from electromyography (EMG) data across of all trials  
 110 performed during single-ankle control tasks, single-knee control tasks as well as simultaneous ankle-knee  
 111 control tasks. Histograms are reported relative to low-gain (LG) and high-gain (HG) assistance levels. Data  
 112 are relative to stroke patient 2 and to the incomplete spinal cord injury patient (SCI), Table 1.

113

114

115

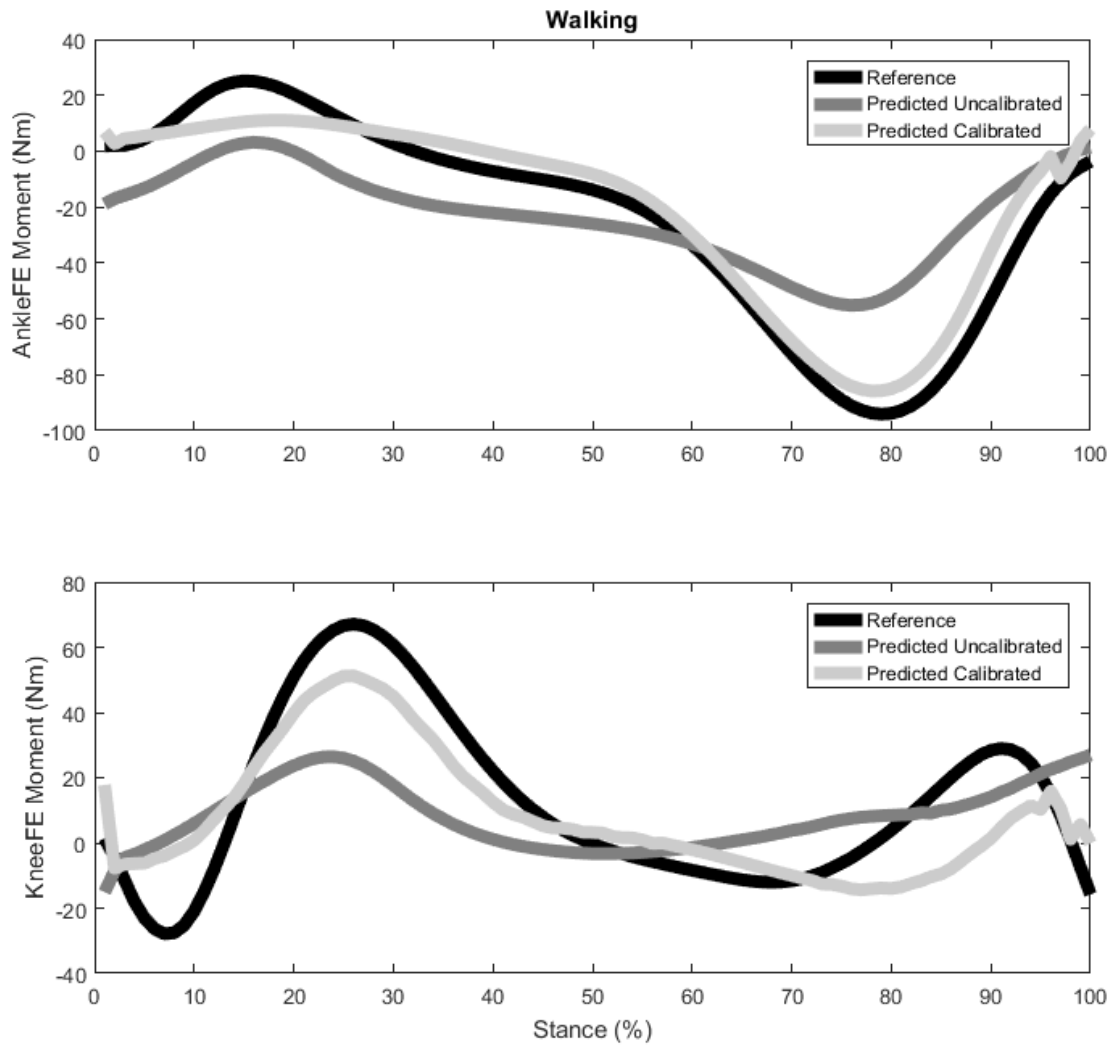

116

117 **Supplementary figure S9. Predicted moment for the Ankle plantar-dorsiflexion and the Knee flexion-**  
 118 **extension using an uncalibrated model.** Average of 5 subjects for a locomotion task (fast walking), with in  
 119 grey line the predicted moment using a uncalibrated model, in light grey the predicted moment using a  
 120 calibrated model and in black line the experimental moment from inverse dynamics using the OpenSim  
 121 Software. Data taken from (1).

122

123

| <i>Sbjs</i>     | Ankle<br>OUT-type<br>N.m<br>(mean±<br>std) |      | Knee<br>OUT-type<br>N.m (mean±<br>std) |      | Multi-DOF<br>OUT-type<br>N.m (mean±<br>std) |      |       |      | Ankle<br>IN-type<br>N.m (mean±<br>std) |      | Knee<br>IN-type<br>N.m (mean±<br>std) |      | Multi-DOF<br>IN-type<br>N.m (mean±<br>std) |      |       |      |
|-----------------|--------------------------------------------|------|----------------------------------------|------|---------------------------------------------|------|-------|------|----------------------------------------|------|---------------------------------------|------|--------------------------------------------|------|-------|------|
|                 |                                            |      |                                        |      | Knee                                        |      | Ankle |      |                                        |      |                                       |      | Knee                                       |      | Ankle |      |
|                 | HG                                         | LG   | HG                                     | LG   | HG                                          | LG   | HG    | LG   | HG                                     | LG   | HG                                    | LG   | HG                                         | LG   | HG    | LG   |
| <i>Sbj1</i>     | 0.81                                       | 1.24 | 0.50                                   | 1.31 | 0.71                                        | 1.34 | 1.42  | 2.97 | 0.44                                   | 10.6 | 0.69                                  | 5.57 | 1.69                                       | 6.26 | 5.40  | 13.7 |
|                 | ±                                          | ±    | ±                                      | ±    | ±                                           | ±    | ±     | ±    | ±                                      | ±    | ±                                     | ±    | ±                                          | ±    | ±     | ±    |
| <i>Sbj2</i>     | 0.24                                       | 0.87 | 0.09                                   | 0.39 | 0.11                                        | 0.05 | 0.88  | 0.20 | 0.03                                   | 1.61 | 0.03                                  | 0.87 | 0.40                                       | 0.33 | 4.81  | 2.48 |
|                 | ±                                          | ±    | ±                                      | ±    | ±                                           | ±    | ±     | ±    | ±                                      | ±    | ±                                     | ±    | ±                                          | ±    | ±     | ±    |
| <i>Sbj3</i>     | 1.83                                       | 3.79 | 1.22                                   | 3.5  | 4.50                                        | 8.33 | 6.34  | 8.18 | 1.25                                   | 3.28 | 1.72                                  | 3.97 | 5.17                                       | 7.22 | 18.3  | 14.0 |
|                 | ±                                          | ±    | ±                                      | ±    | ±                                           | ±    | ±     | ±    | ±                                      | ±    | ±                                     | ±    | ±                                          | ±    | ±     | ±    |
| <i>Sbj4</i>     | 0.24                                       | 0.73 | 0.33                                   | 2.1  | 0.98                                        | 0.94 | 2.09  | 1.55 | 0.24                                   | 0.79 | 0.51                                  | 1.26 | 1.72                                       | 1.57 | 6.61  | 4.95 |
|                 | ±                                          | ±    | ±                                      | ±    | ±                                           | ±    | ±     | ±    | ±                                      | ±    | ±                                     | ±    | ±                                          | ±    | ±     | ±    |
| <i>Stroke 1</i> | 1.11                                       | 2.18 | 1.11                                   | 2.96 | 3.72                                        | 4.57 | 6.80  | 5.55 | 0.35                                   | 2.37 | 0.20                                  | 0.62 | 0.41                                       | 1.19 | 0.77  | 11.8 |
|                 | ±                                          | ±    | ±                                      | ±    | ±                                           | ±    | ±     | ±    | ±                                      | ±    | ±                                     | ±    | ±                                          | ±    | ±     | ±    |
| <i>Stroke 2</i> | 0.40                                       | 1.07 | 0.56                                   | 0.16 | 1.15                                        | 0.38 | 2.81  | 1.19 | 0.05                                   | 1.73 | 0.01                                  | 0.10 | 0.05                                       | 0.12 | 0.09  | 0.02 |
|                 | ±                                          | ±    | ±                                      | ±    | ±                                           | ±    | ±     | ±    | ±                                      | ±    | ±                                     | ±    | ±                                          | ±    | ±     | ±    |
| <i>SCI</i>      | 1.18                                       | 2.03 | 0.73                                   | 1.03 | 0.85                                        | 1.69 | 2.17  | 3.87 | 0.41                                   | 4.01 | 0.39                                  | 2.83 | 0.57                                       | 1.25 | 3.31  | 10.9 |
|                 | ±                                          | ±    | ±                                      | ±    | ±                                           | ±    | ±     | ±    | ±                                      | ±    | ±                                     | ±    | ±                                          | ±    | ±     | ±    |
| <i>Stroke 1</i> | 0.20                                       | 0.38 | 0.06                                   | 0.17 | 0.03                                        | 0.44 | 0.13  | 1.29 | 0.23                                   | 2.83 | 0.03                                  | 0.26 | 0.04                                       | 0.54 | 3.66  | 2.15 |
|                 | ±                                          | ±    | ±                                      | ±    | ±                                           | ±    | ±     | ±    | ±                                      | ±    | ±                                     | ±    | ±                                          | ±    | ±     | ±    |
| <i>Stroke 2</i> | 0.82                                       | 2.85 | 0.38                                   | 0.69 | 0.73                                        | 1.25 | 1.72  | 2.17 | N/A                                    | N/A  | N/A                                   | N/A  | N/A                                        | N/A  | N/A   | N/A  |
|                 | ±                                          | ±    | ±                                      | ±    | ±                                           | ±    | ±     | ±    | ±                                      | ±    | ±                                     | ±    | ±                                          | ±    | ±     | ±    |
| <i>SCI</i>      | 0.62                                       | 1.67 | 0.15                                   | 0.18 | 0.14                                        | 0.09 | 0.08  | 0.46 | N/A                                    | N/A  | N/A                                   | N/A  | N/A                                        | N/A  | N/A   | N/A  |
|                 | ±                                          | ±    | ±                                      | ±    | ±                                           | ±    | ±     | ±    | ±                                      | ±    | ±                                     | ±    | ±                                          | ±    | ±     | ±    |
| <i>Stroke 2</i> | 1.51                                       | 2.98 | 0.89                                   | 2.15 | 2.10                                        | 2.80 | 2.20  | 2.50 | 1.12                                   | 1.62 | 1.31                                  | 2.10 | 3.61                                       | 7.21 | 3.16  | 6.86 |
|                 | ±                                          | ±    | ±                                      | ±    | ±                                           | ±    | ±     | ±    | ±                                      | ±    | ±                                     | ±    | ±                                          | ±    | ±     | ±    |
| <i>SCI</i>      | 1.02                                       | 0.75 | 0.44                                   | 0.21 | 0.70                                        | 0.34 | 0.25  | 1.11 | 0.57                                   | 0.96 | 0.07                                  | 1.00 | 0.72                                       | 1.16 | 0.98  | 0.60 |
|                 | ±                                          | ±    | ±                                      | ±    | ±                                           | ±    | ±     | ±    | ±                                      | ±    | ±                                     | ±    | ±                                          | ±    | ±     | ±    |
| <i>SCI</i>      | 3.82                                       | 6.65 | 3.07                                   | 7.10 | N/A                                         | N/A  | N/A   | N/A  | 4.29                                   | 7.14 | 1.49                                  | 1.62 | 1.15                                       | 1.63 | 3.58  | 4.88 |
|                 | ±                                          | ±    | ±                                      | ±    | N/A                                         | N/A  | N/A   | N/A  | ±                                      | ±    | ±                                     | ±    | ±                                          | ±    | ±     | ±    |
| <i>SCI</i>      | 1.37                                       | 2.28 | 0.77                                   | 0.77 | N/A                                         | N/A  | N/A   | N/A  | 0.24                                   | 0.35 | 0.08                                  | 0.47 | 0.01                                       | 0.00 | 0.17  | 0.28 |
|                 | ±                                          | ±    | ±                                      | ±    | N/A                                         | N/A  | N/A   | N/A  | ±                                      | ±    | ±                                     | ±    | ±                                          | ±    | ±     | ±    |

126 **Supplementary Table S1: Joint moment modulation across assistance levels.** Root mean squared sum of  
127 joint moments averaged across all trials for each subject and condition, i.e. see Figs 2-3, 5-6. Data are reported  
128 both relative to the low-gain (LG) and high-gain (HG) exoskeleton assistance levels.

|                 | Ankle<br>OUT-type |     | Knee<br>OUT-type |     | Multi-DOF<br>OUT-type |     |       |     | Ankle<br>IN-type |     | Knee<br>IN-type |     | Multi-DOF<br>IN-type |     |       |     |
|-----------------|-------------------|-----|------------------|-----|-----------------------|-----|-------|-----|------------------|-----|-----------------|-----|----------------------|-----|-------|-----|
|                 | HG                | LG  | HG               | LG  | Knee                  |     | Ankle |     | HG               | LG  | HG              | LG  | Knee                 |     | Ankle |     |
|                 |                   |     |                  |     | HG                    | LG  | HG    | LG  |                  |     |                 |     | HG                   | LG  | HG    | LG  |
| <b>Stroke 1</b> | 5.0               | 2.0 | 20               | 10  | 5.0                   | 2.5 | 20    | 10  | N/A              | N/A | N/A             | N/A | N/A                  | N/A | N/A   | N/A |
| <b>Stroke 2</b> | 10                | 5.0 | 10               | 5.0 | 10                    | 5.0 | 10    | 5.0 | 6.0              | 3.0 | 7.0             | 3.0 | 6.0                  | 3.0 | 5.0   | 3.0 |
| <b>SCI</b>      | 2.0               | 1.0 | 2.0              | 1.0 | N/A                   | N/A | N/A   | N/A | 2.0              | 1.0 | 3.0             | 6.0 | 2.0                  | 1.0 | 6.0   | 3.0 |

131 **Supplementary Table S2: Gain used for the assistance for the patients.** This gain were used during the  
132 experiments were they determined the assistance given by the exoskeleton. This gain were sectioned to give  
133 comfortable assistance and were determined experimentally.

134

135

- 136 1. Sartori M, Maculan M, Pizzolato C, Reggiani M, Farina D, Claudio P, et al. Modeling and simulating  
137 the neuromuscular mechanisms regulating ankle and knee joint stiffness during human locomotion. *J*  
138 *Neurophysiol.* 2015;114(4):2509–27.

139
